# Supplementary material for: SOX9 Expression in Colorectal Adenomas Improves Surveillance Colonoscopy Risk Stratification in a Bowel Screening Population
Source: bioRxiv or medRxiv preprint supplement (doi:10.1101/2024.06.28.24309576), 2024-06-28
Supplement: Supplementary file [file media-3.pdf]

**Supplementary Table 1. Cohort Description as Included in the Analysis**

|                                         |                     | Mutational Cohort |    | Training Dataset |     | Test Dataset |     |
|-----------------------------------------|---------------------|-------------------|----|------------------|-----|--------------|-----|
|                                         |                     | 598               | %  | 818              | 70% | 358          | 30% |
| Sex                                     | Female              | 152               | 25 | 234              | 29% | 90           | 25% |
|                                         | Male                | 446               | 75 | 584              | 71% | 268          | 75% |
| Age                                     | Screening Age       | 570               | 95 | 785              | 96% | 341          | 95% |
|                                         | Above Screening Age | 28                | 5  | 33               | 4%  | 17           | 5%  |
| Site                                    | Right Colon         | 102               | 17 | 100              | 12% | 61           | 17% |
|                                         | Left Colon          | 421               | 71 | 595              | 73% | 259          | 73% |
|                                         | Rectum              | 73                | 12 | 121              | 15% | 37           | 10% |
| High Grade Dysplasia                    | Absent              | 504               | 84 | 686              | 84% | 300          | 84% |
|                                         | Present             | 94                | 16 | 132              | 16% | 58           | 16% |
| Number of Polyps                        | 1                   | 186               | 31 | 278              | 34% | 102          | 29% |
|                                         | 2-4                 | 297               | 50 | 440              | 54% | 194          | 54% |
|                                         | 5+                  | 115               | 19 | 100              | 12% | 62           | 17% |
| Polyp Type                              | Tubular             | 239               | 40 | 364              | 45% | 144          | 40% |
|                                         | Tubulovillous       | 315               | 53 | 396              | 48% | 198          | 55% |
|                                         | Villous             | 41                | 7  | 57               | 7%  | 16           | 5%  |
| BSG2020 Guidelines                      | Low Risk            | 200               | 33 | 280              | 34% | 105          | 29% |
|                                         | High Risk           | 398               | 67 | 538              | 66% | 253          | 71% |
| Detection of Metachronous Polyps or CRC | No                  | 233               | 39 | 363              | 44% | 153          | 43% |
|                                         | Yes                 | 365               | 61 | 455              | 56% | 205          | 57% |

**Supplementary Table 2. Relationship between Cytoplasmic SOX9 Adenoma Expression and Clinicopathological Characteristics in the INCISE Cohort**

|                                      |                           | Training N=771 |     |                 |     | Test N=336 |                |     |                 |     |       |
|--------------------------------------|---------------------------|----------------|-----|-----------------|-----|------------|----------------|-----|-----------------|-----|-------|
|                                      |                           | Low Expression |     | High Expression |     | P          | Low Expression |     | High Expression |     | P     |
|                                      |                           | 672            | 87% | 99              | 13% |            | 297            | 88% | 39              | 12% |       |
| Sex                                  | Female                    | 196            | 29% | 25              | 25% | 0.421      | 76             | 26% | 8               | 21% | 0.491 |
|                                      | Male                      | 476            | 71% | 74              | 75% |            | 221            | 74% | 31              | 79% |       |
| Age                                  | 50-74 (Screening Age)     | 642            | 96% | 96              | 97% | 0.510      | 287            | 97% | 34              | 87% | 0.007 |
|                                      | 75+ (Above Screening Age) | 30             | 4%  | 3               | 3%  |            | 10             | 3%  | 5               | 13% |       |
| Site                                 | Right Colon               | 79             | 12% | 19              | 19% | <0.001     | 45             | 15% | 9               | 23% | 0.201 |
|                                      | Left Colon                | 507            | 76% | 49              | 50% |            | 222            | 75% | 24              | 62% |       |
|                                      | Rectum                    | 85             | 12% | 31              | 31% |            | 29             | 10% | 6               | 15% |       |
| High Grade Dysplasia                 | Absent                    | 567            | 84% | 78              | 79% | 0.160      | 253            | 85% | 28              | 72% | 0.034 |
|                                      | Present                   | 105            | 16% | 21              | 21% |            | 44             | 15% | 11              | 28% |       |
| Number of Polyps                     | 1                         | 227            | 34% | 35              | 35% | 0.321      | 88             | 30% | 9               | 23% | 0.693 |
|                                      | 2-4                       | 368            | 55% | 48              | 49% |            | 162            | 54% | 23              | 59% |       |
|                                      | 5+                        | 77             | 11% | 16              | 16% |            | 47             | 16% | 7               | 18% |       |
| Polyp Type                           | Tubular                   | 301            | 45% | 41              | 42% | 0.009      | 120            | 40% | 15              | 39% | 0.935 |
|                                      | Tubulovillous             | 329            | 49% | 45              | 46% |            | 165            | 56% | 22              | 56% |       |
|                                      | Villous                   | 42             | 6%  | 12              | 12% |            | 12             | 4%  | 2               | 5%  |       |
| BSG2020 Guidelines                   | Low Risk                  | 229            | 34% | 35              | 35% | 0.803      | 89             | 30% | 11              | 28% | 0.821 |
|                                      | High Risk                 | 443            | 66% | 64              | 65% |            | 208            | 70% | 28              | 72% |       |
| Metachronous Polyps or CRC Detection | No                        | 312            | 46% | 32              | 32% | 0.008      | 134            | 45% | 10              | 26% | 0.021 |
|                                      | Yes                       | 360            | 54% | 67              | 68% |            | 163            | 55% | 29              | 74% |       |

**Supplementary Table 3. List of Genes in Agilent SureSelect CancerPlus Panel**

| <b>Gene</b> | <b>Number of Patients Affected by Mutations</b> | <b>Rank</b> |
|-------------|-------------------------------------------------|-------------|
| ABL1        | 15                                              | 129         |
| ABL2        | 14                                              | 139         |
| ABR         | 9                                               | 201         |
| ABRAXAS1    | 4                                               | 281         |
| ACVR1B      | 8                                               | 212         |
| ACVR2A      | 34                                              | 45          |
| AJUBA       | 5                                               | 258         |
| AKAP9       | 44                                              | 28          |
| AKT1        | 4                                               | 282         |
| AKT2        | 1                                               | 320         |
| AKT3        | 5                                               | 259         |
| ALK         | 27                                              | 75          |
| ALOX12B     | 10                                              | 184         |
| ALOX15B     | 13                                              | 144         |
| AMER1       | 42                                              | 32          |
| APC         | 475                                             | 1           |
| APLNR       | 5                                               | 260         |
| AR          | 25                                              | 84          |
| ARAF        | 14                                              | 141         |
| ARHGAP35    | 30                                              | 58          |
| ARID1A      | 77                                              | 9           |
| ARID1B      | 40                                              | 34          |
| ARID2       | 49                                              | 20          |
| ARID5B      | 17                                              | 121         |
| ASXL1       | 37                                              | 40          |
| ASXL2       | 31                                              | 54          |
| ATM         | 48                                              | 22          |
| ATR         | 34                                              | 46          |
| ATRX        | 49                                              | 21          |
| AURKA       | 0                                               | 331         |
| AURKB       | 5                                               | 257         |
| AURKC       | 9                                               | 202         |
| AXIN1       | 7                                               | 231         |
| AXIN2       | 31                                              | 55          |
| AXL         | 0                                               | 332         |
| B2M         | 1                                               | 321         |
| BAP1        | 13                                              | 145         |
| BARD1       | 15                                              | 131         |
| BCL2        | 0                                               | 333         |
| BCOR        | 52                                              | 17          |
| BIRC3       | 6                                               | 243         |
| BLM         | 26                                              | 79          |
| BRAF        | 31                                              | 56          |
| BRCA1       | 28                                              | 70          |
| BRCA2       | 56                                              | 16          |
| BRIP1       | 18                                              | 113         |
| CARD11      | 21                                              | 97          |
| CASP8       | 14                                              | 142         |

|         |    |     |
|---------|----|-----|
| CBFB    | 4  | 283 |
| CBL     | 15 | 133 |
| CCND1   | 2  | 309 |
| CCND2   | 0  | 334 |
| CCND3   | 5  | 261 |
| CCNE1   | 5  | 262 |
| CD274   | 10 | 185 |
| CD58    | 3  | 293 |
| CD74    | 2  | 310 |
| CDC73   | 11 | 164 |
| CDH1    | 17 | 122 |
| CDK12   | 18 | 115 |
| CDK2    | 2  | 311 |
| CDK4    | 3  | 294 |
| CDK6    | 1  | 322 |
| CDK8    | 13 | 150 |
| CDKN1A  | 2  | 312 |
| CDKN1B  | 4  | 279 |
| CDKN1C  | 1  | 323 |
| CDKN2A  | 2  | 313 |
| CDKN2B  | 5  | 263 |
| CDKN2C  | 3  | 295 |
| CHD4    | 46 | 24  |
| CHD8    | 38 | 39  |
| CHEK1   | 5  | 264 |
| CHEK2   | 11 | 169 |
| CIC     | 17 | 123 |
| CIITA   | 23 | 91  |
| CKS1B   | 1  | 324 |
| COL17A1 | 23 | 87  |
| CREBBP  | 32 | 50  |
| CTCF    | 11 | 165 |
| CTLA4   | 4  | 284 |
| CTNNB1  | 39 | 37  |
| CUL3    | 45 | 27  |
| CUX1    | 26 | 77  |
| CYLD    | 8  | 213 |
| DAXX    | 7  | 229 |
| DDR2    | 19 | 109 |
| DDX3X   | 5  | 265 |
| DDX5    | 7  | 232 |
| DEFB134 | 0  | 335 |
| DHX9    | 25 | 82  |
| DICER1  | 30 | 61  |
| DNMT1   | 13 | 146 |
| DNMT3A  | 6  | 244 |
| EGFR    | 20 | 104 |
| EIF4A2  | 3  | 296 |
| ELF3    | 36 | 42  |
| ELOC    | 3  | 297 |

|        |    |     |
|--------|----|-----|
| EP300  | 38 | 38  |
| EPHA2  | 10 | 186 |
| EPHA3  | 20 | 105 |
| ERBB2  | 20 | 102 |
| ERBB3  | 28 | 71  |
| ERBB4  | 18 | 116 |
| ERCC2  | 13 | 147 |
| ERCC3  | 17 | 119 |
| ERCC4  | 33 | 49  |
| ERCC5  | 0  | 336 |
| ERG    | 9  | 203 |
| ESR1   | 17 | 124 |
| ETV1   | 10 | 187 |
| ETV4   | 5  | 266 |
| ETV5   | 42 | 33  |
| ETV6   | 11 | 170 |
| EZH2   | 8  | 214 |
| FANCA  | 29 | 66  |
| FANCC  | 5  | 267 |
| FANCD2 | 23 | 88  |
| FANCE  | 6  | 245 |
| FANCF  | 6  | 241 |
| FANCG  | 11 | 166 |
| FANCL  | 3  | 298 |
| FANCM  | 65 | 13  |
| FAS    | 4  | 285 |
| FAT1   | 74 | 11  |
| FBXW7  | 75 | 10  |
| FGF19  | 1  | 325 |
| FGFR1  | 6  | 246 |
| FGFR2  | 10 | 188 |
| FGFR3  | 11 | 171 |
| FGFR4  | 10 | 189 |
| FLT1   | 18 | 114 |
| FOXA1  | 3  | 299 |
| FOXA2  | 6  | 247 |
| FOXL2  | 2  | 314 |
| FOXO1  | 8  | 215 |
| FOXP1  | 0  | 337 |
| FUBP1  | 10 | 181 |
| GATA3  | 11 | 172 |
| GATA6  | 21 | 99  |
| GNA11  | 3  | 300 |
| GNA13  | 2  | 315 |
| GNAQ   | 1  | 326 |
| GNAS   | 33 | 48  |
| GPS2   | 9  | 204 |
| H3F3A  | 0  | 338 |
| H3F3B  | 0  | 339 |
| HGF    | 4  | 280 |

|          |     |     |
|----------|-----|-----|
| HIF1A    | 11  | 167 |
| HIST1H1C | 0   | 340 |
| HIST1H3B | 0   | 341 |
| HIST1H3C | 0   | 342 |
| HIST2H3C | 0   | 343 |
| HLA-A    | 64  | 14  |
| HLA-B    | 23  | 86  |
| HLA-C    | 20  | 106 |
| HNF1A    | 11  | 168 |
| HRAS     | 5   | 268 |
| IDH1     | 6   | 248 |
| IDH2     | 6   | 249 |
| IDO1     | 6   | 250 |
| IDO2     | 13  | 151 |
| IFNGR1   | 7   | 233 |
| IFNGR2   | 8   | 216 |
| IGF1R    | 0   | 344 |
| IL6ST    | 9   | 205 |
| IRF1     | 0   | 345 |
| JAK1     | 17  | 125 |
| JAK2     | 10  | 182 |
| JAK3     | 5   | 269 |
| JUN      | 5   | 270 |
| KDM5C    | 15  | 134 |
| KDM6A    | 15  | 130 |
| KDR      | 24  | 85  |
| KEAP1    | 10  | 190 |
| KIT      | 15  | 135 |
| KLF4     | 7   | 234 |
| KMT2A    | 34  | 44  |
| KMT2B    | 31  | 57  |
| KMT2C    | 97  | 4   |
| KMT2D    | 79  | 8   |
| KRAS     | 189 | 2   |
| LZTR1    | 13  | 148 |
| MAP2K1   | 8   | 217 |
| MAP2K2   | 5   | 271 |
| MAP2K4   | 9   | 206 |
| MAP3K1   | 29  | 63  |
| MAPK1    | 7   | 230 |
| MAX      | 1   | 327 |
| MCL1     | 7   | 235 |
| MDM2     | 3   | 301 |
| MDM4     | 9   | 199 |
| MECOM    | 10  | 191 |
| MED12    | 27  | 76  |
| MEN1     | 4   | 286 |
| MET      | 18  | 112 |
| MGA      | 80  | 7   |
| MGMT     | 5   | 272 |

|          |    |     |
|----------|----|-----|
| MLH1     | 15 | 136 |
| MRE11    | 10 | 192 |
| MSH2     | 21 | 100 |
| MSH3     | 25 | 80  |
| MSH6     | 28 | 68  |
| MTOR     | 22 | 92  |
| MUTYH    | 10 | 193 |
| MYB      | 7  | 236 |
| MYC      | 4  | 287 |
| MYCL     | 5  | 273 |
| MYCN     | 5  | 274 |
| MYH9     | 20 | 103 |
| NAB2     | 6  | 251 |
| NBN      | 12 | 153 |
| NCOA2    | 32 | 51  |
| NCOR1    | 28 | 69  |
| NF1      | 50 | 19  |
| NF2      | 12 | 154 |
| NFE2L2   | 9  | 198 |
| NLRC5    | 28 | 72  |
| NOTCH1   | 29 | 64  |
| NOTCH2   | 35 | 43  |
| NOTCH3   | 30 | 59  |
| NOTCH4   | 44 | 29  |
| NPM1     | 6  | 252 |
| NRAS     | 28 | 73  |
| NRG1     | 22 | 94  |
| NSD1     | 40 | 35  |
| NSD3     | 25 | 81  |
| NTRK1    | 12 | 155 |
| NTRK2    | 16 | 128 |
| NTRK3    | 19 | 110 |
| PALB2    | 29 | 65  |
| PARP1    | 23 | 89  |
| PAX5     | 12 | 156 |
| PBRM1    | 22 | 95  |
| PCBP1    | 45 | 26  |
| PDCD1LG2 | 2  | 316 |
| PDGFRA   | 0  | 346 |
| PDGFRB   | 12 | 157 |
| PHF6     | 3  | 302 |
| PIAS3    | 11 | 173 |
| PIAS4    | 6  | 253 |
| PIK3CA   | 32 | 52  |
| PIK3CB   | 7  | 237 |
| PIK3CD   | 8  | 218 |
| PIK3R1   | 23 | 90  |
| PIK3R2   | 6  | 242 |
| PIM1     | 3  | 303 |
| PLCG1    | 15 | 137 |

|         |    |     |
|---------|----|-----|
| PMS1    | 11 | 174 |
| PMS2    | 21 | 98  |
| POLE    | 52 | 18  |
| POLQ    | 45 | 25  |
| PPM1D   | 10 | 180 |
| PPP2R1A | 3  | 304 |
| PPP2R2A | 1  | 328 |
| PPP4R2  | 6  | 254 |
| PPP6C   | 2  | 308 |
| PRKAR1A | 10 | 194 |
| PSIP1   | 13 | 149 |
| PTCH1   | 21 | 101 |
| PTEN    | 5  | 275 |
| PTK2    | 9  | 207 |
| PTPN11  | 12 | 158 |
| PTPRD   | 36 | 41  |
| QSER1   | 22 | 93  |
| RAC1    | 2  | 317 |
| RAD21   | 6  | 255 |
| RAD50   | 0  | 347 |
| RAD51B  | 8  | 219 |
| RAD51C  | 7  | 238 |
| RAD51D  | 0  | 348 |
| RAD52   | 8  | 220 |
| RAD54L  | 8  | 221 |
| RAF1    | 11 | 175 |
| RASA1   | 16 | 126 |
| RB1     | 12 | 159 |
| RBM10   | 30 | 60  |
| RET     | 15 | 138 |
| RFX5    | 12 | 160 |
| RFXAP   | 4  | 288 |
| RHEB    | 1  | 329 |
| RHOA    | 4  | 289 |
| RICTOR  | 18 | 117 |
| RIT1    | 0  | 349 |
| RNF43   | 11 | 163 |
| ROS1    | 27 | 74  |
| RPL22   | 12 | 161 |
| RPL5    | 8  | 222 |
| RUNX1   | 11 | 176 |
| SERPIN3 | 8  | 209 |
| SERPIN4 | 7  | 239 |
| SETBP1  | 19 | 108 |
| SETD2   | 42 | 31  |
| SF3B1   | 20 | 107 |
| SLC34A2 | 17 | 118 |
| SMAD2   | 5  | 276 |
| SMAD3   | 2  | 318 |
| SMAD4   | 26 | 78  |



|         |    |     |
|---------|----|-----|
| SMARCA4 | 29 | 62  |
| SMARCB1 | 12 | 162 |
| SMC1A   | 13 | 152 |
| SMC3    | 8  | 210 |
| SMG1    | 57 | 15  |
| SMO     | 16 | 127 |
| SOCS1   | 3  | 305 |
| SOS1    | 17 | 120 |
| SOX17   | 11 | 177 |
| SOX9    | 90 | 5   |
| SPEN    | 47 | 23  |
| SPOP    | 2  | 319 |
| SRC     | 5  | 277 |
| SRSF2   | 1  | 330 |
| STAG1   | 14 | 143 |
| STAG2   | 6  | 256 |
| STAT1   | 9  | 208 |
| STAT3   | 8  | 211 |
| STAT5B  | 10 | 195 |
| STK11   | 4  | 290 |
| SYK     | 10 | 196 |
| TAF1    | 29 | 67  |
| TAF3    | 14 | 140 |
| TAP1    | 9  | 200 |
| TAP2    | 5  | 278 |
| TAPBP   | 3  | 306 |
| TBL1XR1 | 8  | 223 |
| TBX3    | 15 | 132 |
| TCF12   | 11 | 178 |
| TCF7L2  | 66 | 12  |
| TERT    | 0  | 350 |
| TET2    | 34 | 47  |
| TGFBR1  | 32 | 53  |
| TGFBR2  | 7  | 240 |
| TMPRSS2 | 3  | 307 |
| TP53    | 81 | 6   |
| TP53BP1 | 39 | 36  |
| TP73    | 8  | 224 |
| TRAF7   | 8  | 225 |
| TSC1    | 19 | 111 |
| TSC2    | 43 | 30  |
| U2AF1   | 0  | 351 |
| UVRAG   | 8  | 226 |
| VHL     | 3  | 292 |
| WRN     | 22 | 96  |
| WT1     | 4  | 291 |
| XBP1    | 7  | 228 |
| XPO1    | 11 | 179 |
| YAP1    | 0  | 352 |
| ZFHX3   | 99 | 3   |

|         |    |     |
|---------|----|-----|
| ZFP36L1 | 10 | 197 |
| ZMYM2   | 25 | 83  |
| ZMYM3   | 8  | 227 |
| ZNF703  | 10 | 183 |
| ZNF750  | 0  | 353 |

**Supplementary Table 4. Top 10 Somatic Interactions for Mutated Gene Pairs**

| Rank | Gene 1        | Gene 2       | Event              | Adjusted P-Value | Statistically Significant | Event Ratio (Gene 1/Gene2) | Event Ratio (%) |
|------|---------------|--------------|--------------------|------------------|---------------------------|----------------------------|-----------------|
| 1    | <i>TCF7L2</i> | <i>KRAS</i>  | Co-occurrence      | 0.009285972      | Yes                       | 45/203                     | 22              |
| 2    | <i>MGA</i>    | <i>KMT2C</i> | Co-occurrence      | 0.010712746      | Yes                       | 28/144                     | 19              |
| 3    | <i>SOX9</i>   | <i>KRAS</i>  | Co-occurrence      | 0.010712746      | Yes                       | 48/206                     | 23              |
| 4    | <i>SOX9</i>   | <i>APC</i>   | Co-occurrence      | 0.046736556      | Yes                       | 96/432                     | 22              |
| 5    | <i>MGA</i>    | <i>KMT2D</i> | Co-occurrence      | 0.068406272      | No                        | 21/134                     | 16              |
| 6    | <i>KRAS</i>   | <i>APC</i>   | Co-occurrence      | 0.082777185      | No                        | 185/354                    | 52              |
| 7    | <i>ZFHX3</i>  | <i>KMT2D</i> | Co-occurrence      | 0.094753799      | No                        | 23/146                     | 16              |
| 8    | <i>MGA</i>    | <i>APC</i>   | Co-occurrence      | 0.320018639      | No                        | 82/447                     | 18              |
| 9    | <i>MGA</i>    | <i>SOX9</i>  | Co-occurrence      | 0.399320412      | No                        | 20/149                     | 13              |
| 10   | <i>MSH3</i>   | <i>KRAS</i>  | Mutually Exclusive | 0.399320412      | No                        | 35/257                     | 14              |

**Supplementary Table 5. Incidence of Metachronous Lesion Types with Combined Cytoplasmic SOX9 and BSG2020 Guidelines**

|                                | Training |     |                   |     |           |     | P                 | Test     |     |                   |     |           |     |              |
|--------------------------------|----------|-----|-------------------|-----|-----------|-----|-------------------|----------|-----|-------------------|-----|-----------|-----|--------------|
|                                | Low Risk |     | Intermediate Risk |     | High Risk |     |                   | Low Risk |     | Intermediate Risk |     | High Risk |     | P            |
|                                | 229      | 30  | 47                | 62% | 64        | 8%  |                   | 89       | 26% | 219               | 65% | 28        | 8%  |              |
| <b>None</b>                    | 133      | 58% | 191               | 40% | 18        | 28% | <b>&lt;0.0001</b> | 50       | 56% | 87                | 40% | 7         | 25% | <b>0.014</b> |
| <b>Non-Advanced Adenoma</b>    | 66       | 29% | 205               | 43% | 22        | 34% |                   | 28       | 32% | 97                | 44% | 13        | 46% |              |
| <b>Advanced Adenoma or CRD</b> | 30       | 13% | 82                | 17% | 24        | 38% |                   | 11       | 12% | 35                | 16% | 8         | 29% |              |
